# Supplementary material for: Solid-state synthesis of cesium manganese halide nanocrystals in glass with bright and broad red emission for white LEDs
Source: Royal Society of Chemistry journal article supplement (doi:10.1039/d3sc01084h), 2023-01-01
Supplement: d3sc01084h1.pdf [file d3sc01084h1.pdf]

**Electronic Supporting Information for**

**Solid-State synthesis of cesium manganese halide nanocrystals in glass  
with bright and broad red emission for white LEDs**

Guangyong Xu, Chuying Wang, Yacong Li, Wen Meng, Guigen Luo, Min Peng, Bin Xu  
and Zhengtao Deng\*

College of Engineering and Applied Sciences, State Key Laboratory of Analytical  
Chemistry for Life Science, National Laboratory of Microstructures, Nanjing University,  
Nanjing, Jiangsu, 210023, P. R. China

E-mail: dengz@nju.edu.cn

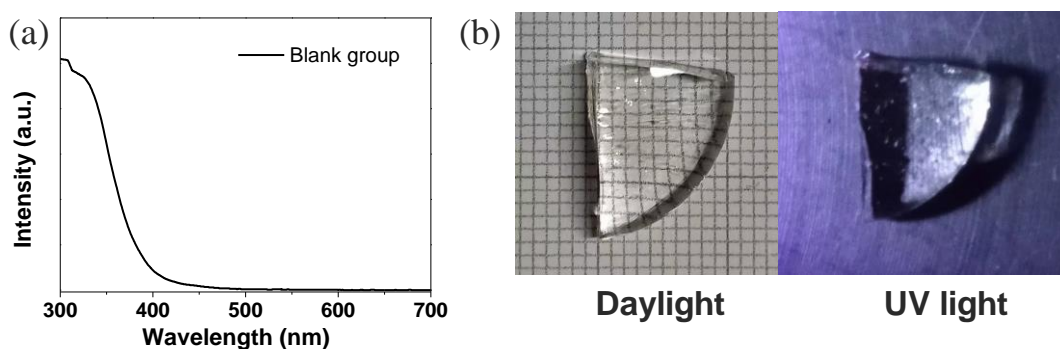

**Fig. S1** The optical properties of the blank group. (a) Absorption spectra. (b) Photographs of blank group under daylight and UV light.

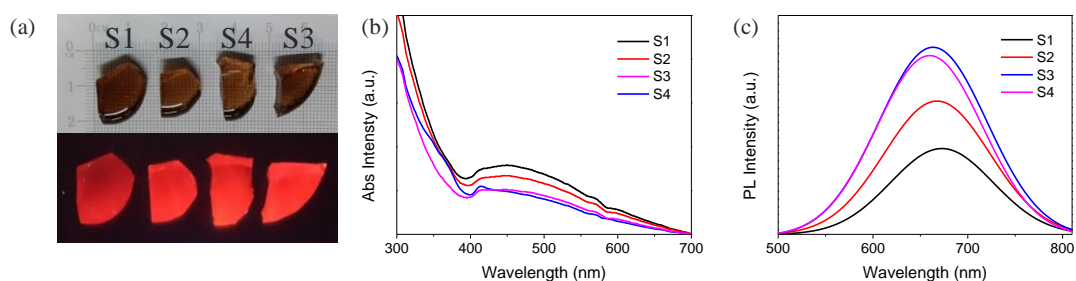

**Fig. S2** (a) Photographs of CsMnBr<sub>3</sub> NCs embedded glasses under daylight and UV light. (b) Absorption spectra, (c) PL spectra. Note: 15SiO<sub>2</sub>-30B<sub>2</sub>O<sub>3</sub>-10ZnO-1Cs<sub>2</sub>CO<sub>3</sub>-1MnCO<sub>3</sub>-xNaBr (x = 5, 7.5, 10, 12.5, denoted as S1, S2, S4, S3).

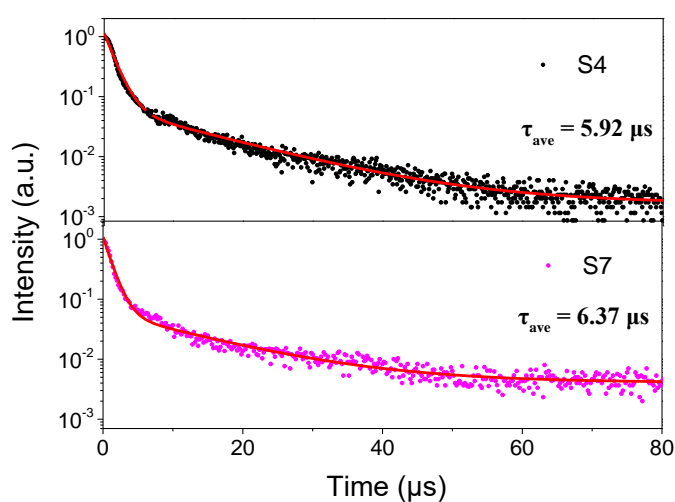

**Fig. S3** PL lifetime decay curves of CsMnBr<sub>3</sub> NCs embedded glasses.

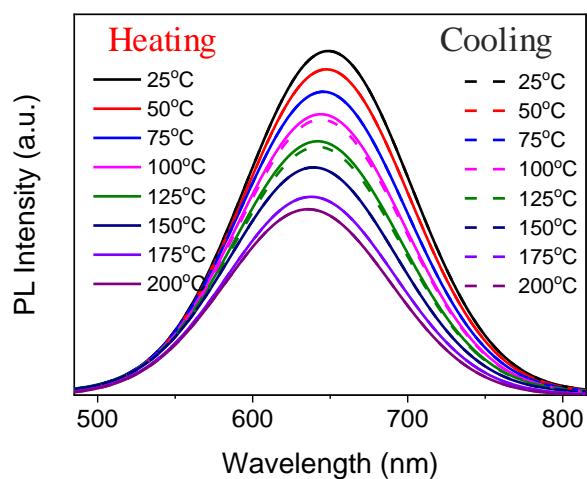

**Fig. S4** Temperature-dependent PL spectra of CsMnBr<sub>3</sub> NCs embedded glasses.

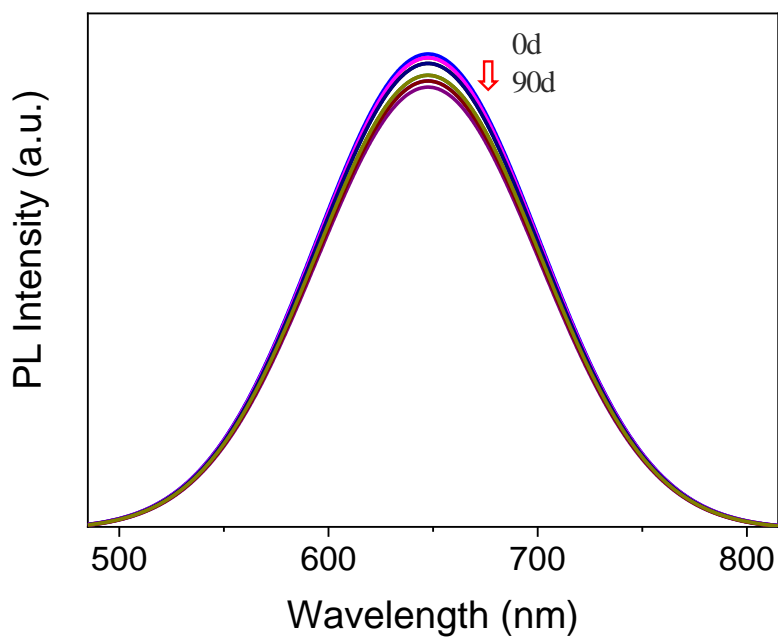

**Fig. S5** The time dependent PL spectra of CsMnBr<sub>3</sub> NCs embedded glasses after soaking in water for 90 days.

**Table S1** Emission stability of the reported perovskites

| Samples                       | Stability (Remnant PL intensity or PLQY) | Condition         | Ref              |
|-------------------------------|------------------------------------------|-------------------|------------------|
| CsPbBr <sub>3</sub> NCs       | no emission                              | Water/1h          | 1                |
| CsPbBr <sub>3</sub> -PBMA     | 78%PL                                    | Air/30d           | 2                |
| CsPbBr <sub>3</sub> -PBMA     | 56%PL                                    | Water/2d          | 2                |
| CsPbBr <sub>3</sub> -PMMA     | 53%PL                                    | Water/15d         | 3                |
| MAPbBr <sub>3</sub> -PS       | 93%PL                                    | Water/60d         | 4                |
| CsPbBr <sub>3</sub> NCs@glass | 85%PL                                    | Water/30d         | 5                |
| CsPbBr <sub>3</sub> NCs@glass | 90%PL                                    | Water/30d         | 6                |
| CsMnBr <sub>3</sub> NCs       | Phase transformation                     | Air/several hours | 7                |
| CsMnBr <sub>3</sub> NCs       | 70%PLQY                                  | Air/20d           | 8                |
| CsMnBr <sub>3</sub> NCs@glass | 95%PL                                    | Water/90d         | <b>This Work</b> |

#### Additional Reference

1. M. Xia, S. Zhu, J. Luo, Y. Xu, P. Tian, G. Niu and J. Tang, *Adv. Optical Mater.* , 2021, **9**, 2002239.
2. Y. Xin, H. Zhao and J. Zhang, *ACS Appl. Mater. Interfaces* 2018, **10**, 4971-4980.
3. Z. Wang, R. Fu, F. Li, H. Xie, P. He, Q. Sha, Z. Tang, N. Wang and H. Zhong, *Adv. Funct. Mater.* , 2021, **31**, 2010009.
4. Y. Wang, J. He, H. Chen, J. Chen, R. Zhu, P. Ma, A. Towers, Y. Lin, A. J. Gesquiere, S. T. Wu and Y. Dong, *Adv. Mater.*, 2016, **28**, 10710-10717.
5. X. Pang, S. Si, L. Xie, X. Zhang, H. Huang, S. Liu, W. Xiao, S. Wang, T. Xuan, J. Zhuang, C. Hu, Y. Liu, B. Lei and H. Zhang, *J. Mater. Chem. C*, 2020, **8**, 17374-17382.
6. C. Yang, B. Zhuang, J. Lin, S. Wang, M. Liu, N. Jiang and D. Chen, *Chem. Eng. J.*, 2020, **398**, 125616.
7. Q. Kong, B. Yang, J. Chen, R. Zhang, S. Liu, D. Zheng, H. Zhang, Q. Liu, Y. Wang and K. Han, *Angew. Chem. Int. Ed.*, 2021, **60**, 19653-19659.
8. J. Almutlaq, W. J. Mir, L. Gutiérrez-Arzaluz, J. Yin, S. Vasylevskyi, P. Maity, J. Liu, R. Naphade, O. F. Mohammed and O. M. Bakr, *ACS Materials Lett.* , 2021, **3**, 290-297.
